# Supplementary material
Source: publisher figshare collection journal article supplement (https://acs.figshare.com/ndownloader/files/13173158)
Supplement: Supplementary file 1 [file 13173158]

# Effects of Polyethylenimine and Its Molecular Weight on the Chemical Bath Deposition of ZnO Nanowires

Romain Parize,<sup>†</sup> Jérôme Daniel Garnier,<sup>†</sup> Estelle Appert,<sup>†</sup> Odette Chaix-Pluchery,<sup>†</sup> and Vincent Consonni<sup>\*,†</sup>

<sup>†</sup> Univ. Grenoble Alpes, CNRS, Grenoble INP, LMGP, F-38000 Grenoble, France

**\*Corresponding authors:** [vincent.consonni@grenoble-inp.fr](mailto:vincent.consonni@grenoble-inp.fr)

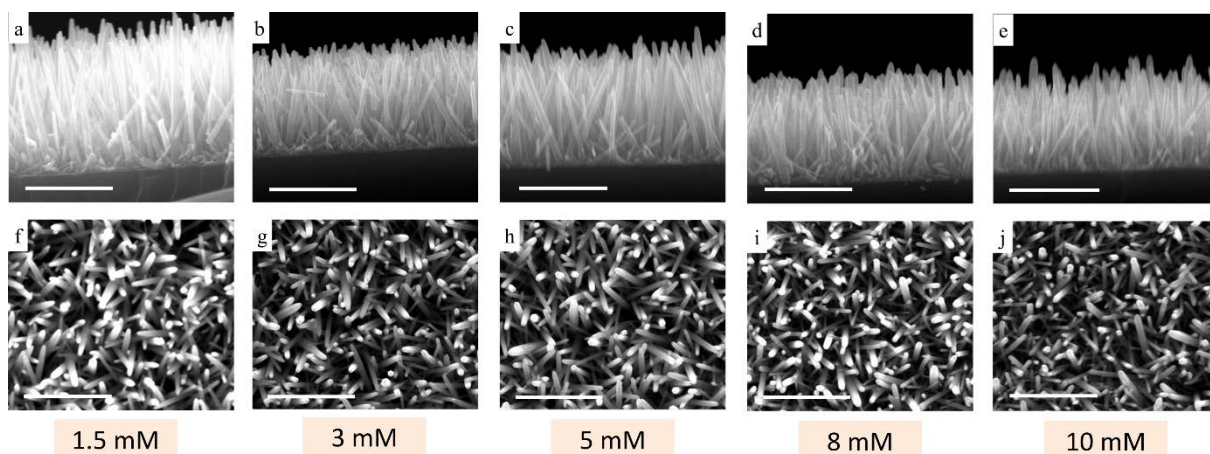

**Figure S1.** (a-e) Cross-sectional view and (f-j) top-view FESEM images of ZnO NWs grown by CBD with a PEI concentration in the range of 1.5 to 10 mM and for a given Mw of 25 000. The scale bars represent 1  $\mu\text{m}$ .

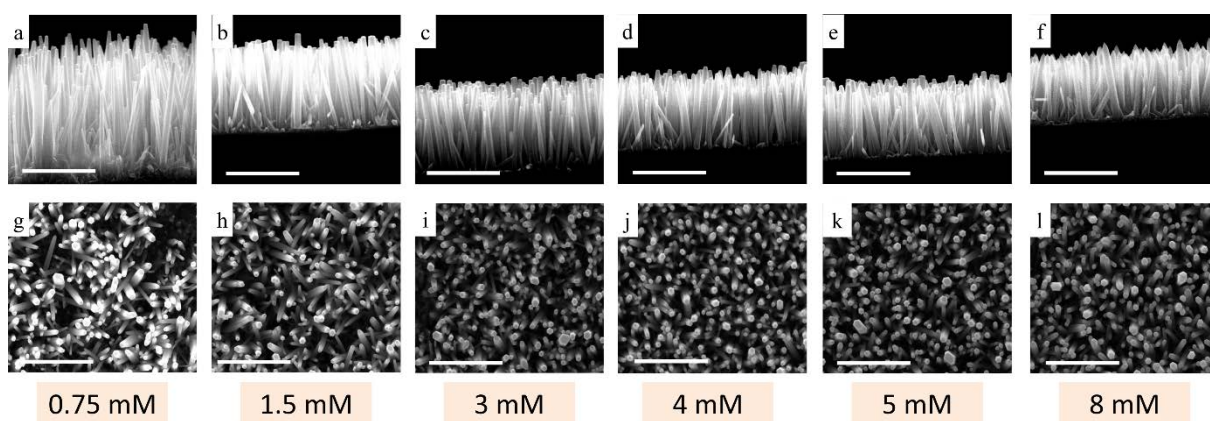

**Figure S2.** (a-f) Cross-sectional view and (g-l) top-view FESEM images of ZnO NWs grown by CBD with a PEI concentration in the range of 0.75 to 8 mM and for a given Mw of 750 000. The scale bars represent 1  $\mu\text{m}$ .
